# Supplementary material for: Effect of calcination on the structure and catalytic activities of titanium incorporated SBA-15
Source: Royal Society of Chemistry journal article supplement (doi:10.1039/c0jm03111a), 2010-12-15
Supplement: c0jm03111a.pdf [file c0jm03111a.pdf]

**Supporting Information**

**Effect of Calcination on the Structure and Catalytic Activities of Titanium**

**Incorporated SBA-15**

Shih-Yuan Chen<sup>a</sup>, Chih-Yuan Tang<sup>b</sup>, Jyh-Fu Lee<sup>c</sup>, Ling-Yun Jang<sup>c</sup>, Takashi Tatsumi<sup>d</sup>,

Soofin Cheng<sup>a,\*</sup>

<sup>a</sup>Department of Chemistry, National Taiwan University, Taipei 106, Taiwan.

<sup>b</sup>Instrumentation Center, National Taiwan University, Taipei 106, Taiwan.

<sup>c</sup>Research Division, National Synchrotron Radiation Research Center, Hsinchu 300,  
Taiwan.

<sup>d</sup>Catalytic Chemistry Division, Chemical Resources Laboratory, Tokyo Institute of  
Technology, 4259-R1-9 Nagatsuta, Midori-ku, Yokohama 226-8503, Japan.

To whom the correspondence should be addressed:

Prof. Soofin Cheng

TEL: +886-2-33661662

FAX: +886-2-23636359

E-mail: [chem1031@ntu.edu.tw](mailto:chem1031@ntu.edu.tw)

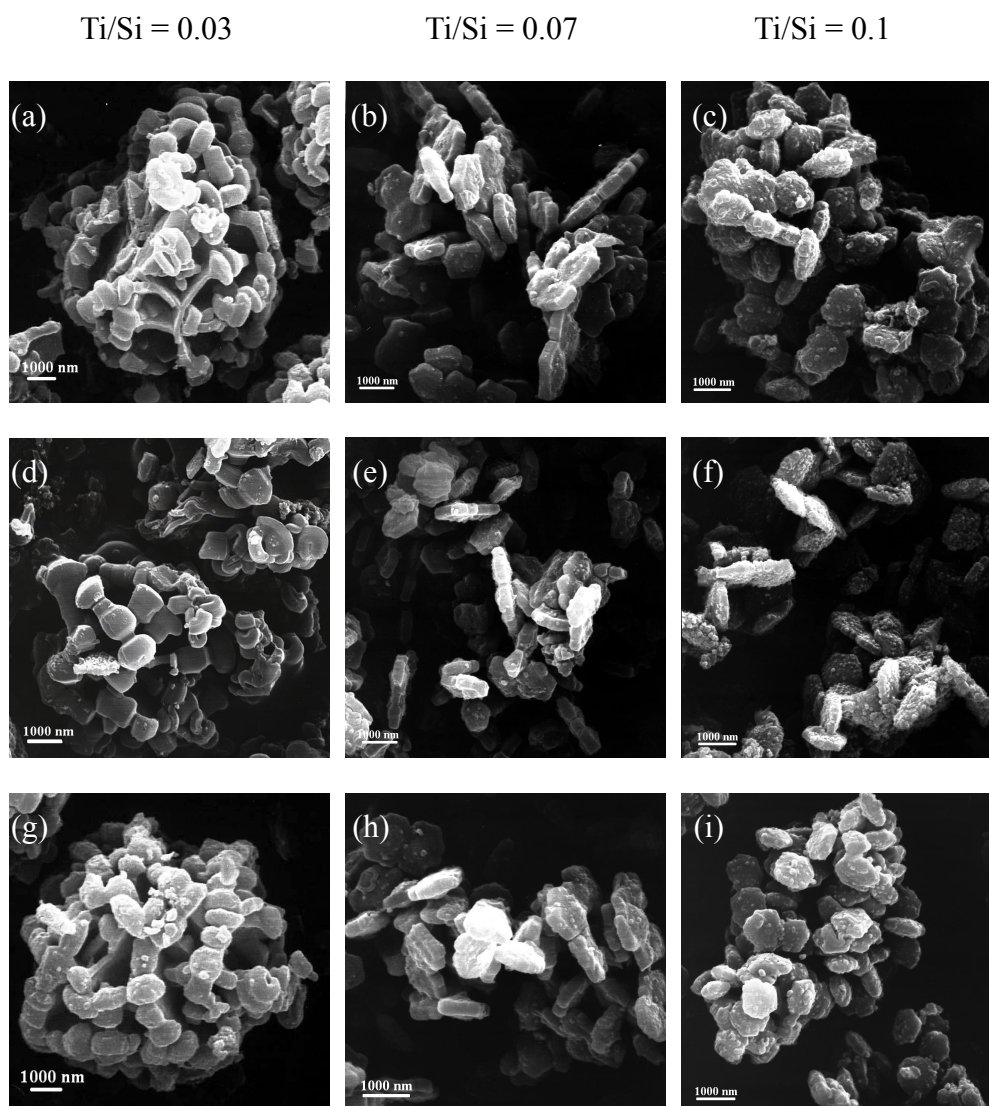

**Fig. S1.** SEM photographs of the (a,b,c) 800 °C, (d,e,f) 900 °C, and (g,h,i) 1000 °C calcined Ti-SBA-15 materials with various Ti/Si ratios of (a, d, g) 0.03, (b, e, h) 0.07, and (c, f, i) 0.1.

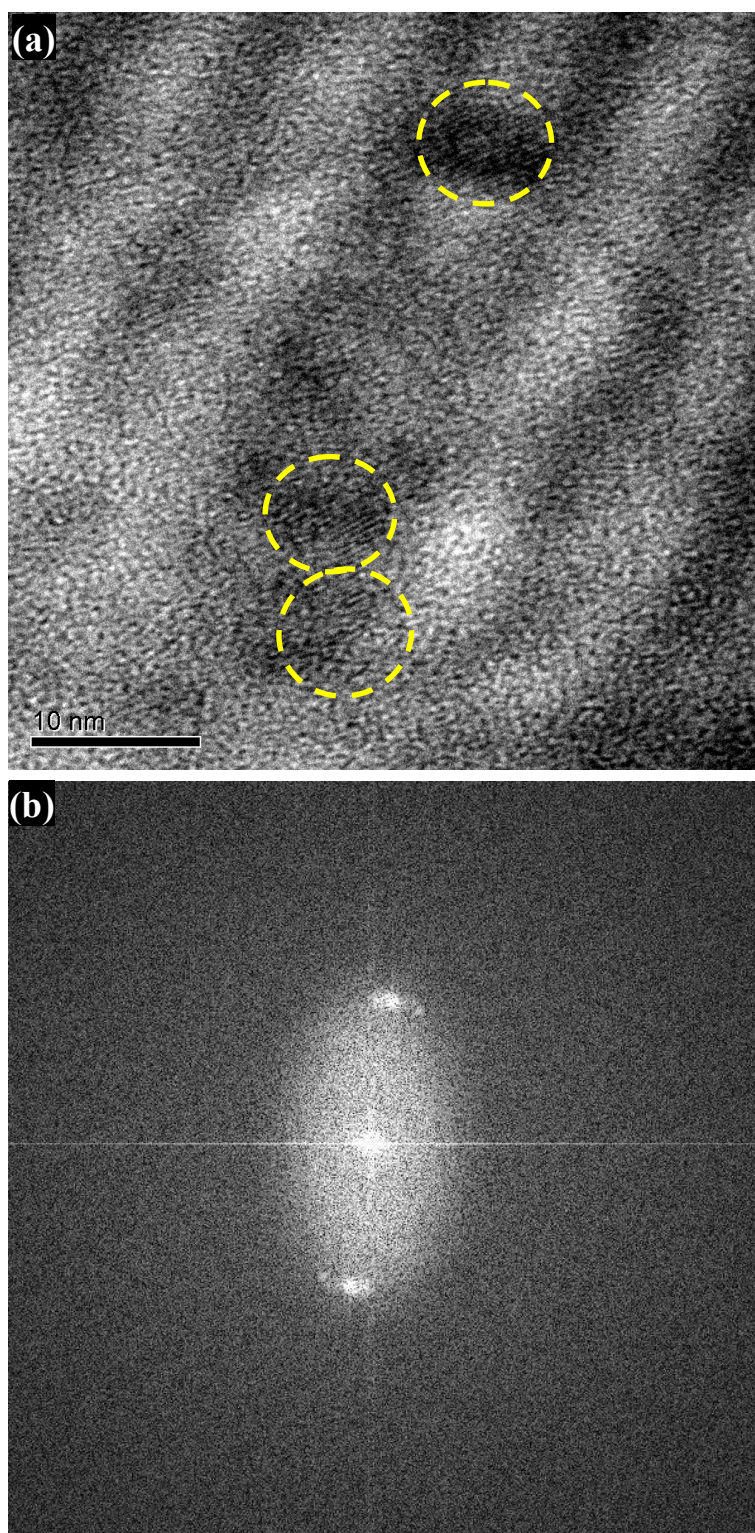

**Fig. S2.** (a) HRTEM photograph and (b) Fourier transform diffraction pattern of the C500-0.1Ti-SBA-15 material.

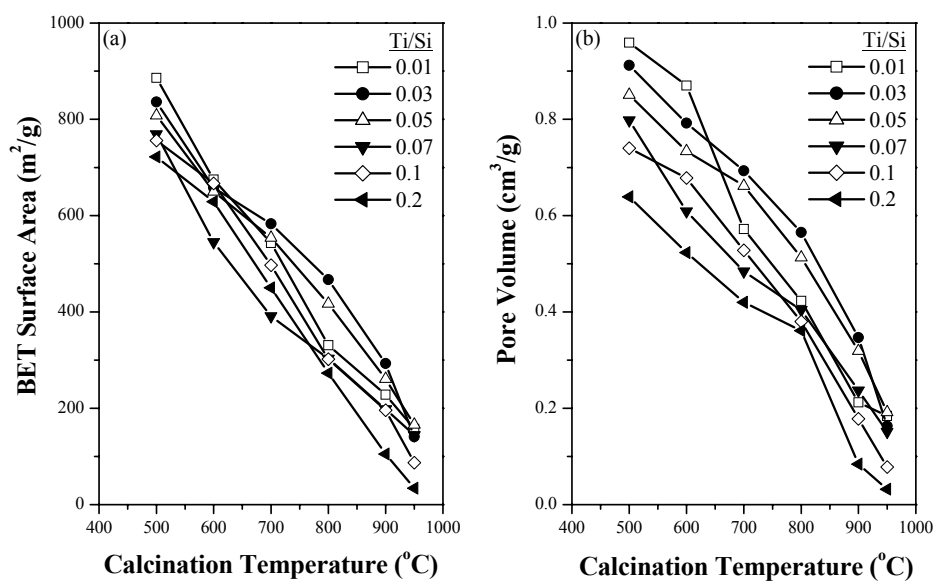

**Fig. S3.** Effect of calcinations temperature on the (a) BET surface areas and (b) pore volumes of the 500–950 °C calcined Ti–SBA–15 materials with various Ti/Si ratios.
